# Supplementary material for: Natural Experiment on the Extraction and Quenching of Rapakivi-like Magmas: Traces of Interaction with the Mafic Melts and Their Derivatives, Salmi Batholith (Karelia, Russia)
Source: MDPI journal article supplement (doi:10.3390/min13040527), 2023-04-08
Supplement: s1 [file TableS1_Rock geochemistry.xls]

## Sheet: Rock samples
	Rapakivi granite	Ground mass of rapakivi granite	Granite porphyry		Fine-equigranular granite xenoliths in granite porphyry		Rare-metal Topaz bearing leicogranite dike
Sample	AK270820-1	190619 - 1	230619 - 3	230619 - 4	Х # 1	Х # 2	230619 - 1		Note:
Type of sample location	bedrock	bedrock	bedrock	bedrock	bedrock	bedrock	bedrock			Fetotal
Location: N (WGS84)	61.5431	61.6035	61.5533	61.5533	61.5497		61.5532		-	Not determined
Location: E (WGS84)	32.0754	31.5461	31.5694	31.5694	31.5758		31.5695		AK270820-1	The major components were determined by
Wt%										XRF, all another by wet chemistry
SiO2	72.86	76.88	72.2	71.2	74.24	74.74	75		F	Were determined by XRF
TiO2	0.44	0.15	0.3	0.3	0.04	0.05	<0,01
Al2O3	12.38	10.64	12.9	12.9	13.07	12.53	14.14		Calculation process according to (Irber, 1999), ([61] in aticle):
Fe2O3	3.83	0.6	1.64	2.5	0.43	0.42	0.41		La-Nd	1 tetrad
FeO	-	2.15	1.87	1.65	1.01	1.29	0.65		Sm-Gd	2 tetrad
MnO	0.045	0.034	0.04	0.062	0.017	0.021	0.016		Gd-Ho	3 tetrad
MgO	0.42	0.4	0.45	0.43	0.25	0.3	0.15		Er-Lu	4 tetrad
CaO	1.57	0.72	0.58	1.38	0.73	0.87	0.15
Na2O	2.91	2.74	2.88	3.02	3.33	3.39	5.29		Main equation:	Ti = ((C2cn/(C1cn2/3×C4cn1/3))/(C3cn/(C1cn1/3×C4cn2/3)))1/2
K2O	4.24	4.9	6.16	5.46	6.42	5.91	3.72			Ti - i- tetrad number
P2O5	0.1	0.04	0.08	0.1	0.03	0.02	0.03			Сn - element number in tetrad from 1 to 4
S	<0,01	<d.l.	<d.l.	<d.l.	<d.l.	<d.l.	<d.l.			Ccn - chondrite [60] normalized value of element concentration
F	<0,10	0.3	<0.10	0.19	0.14	0.18	0.33
Total	98.795	99.554	100	99.74	99.96	99.95	99.82		Overall tetrad effect:	TEn = (Ti×Ti×Ti)1/n
LOI	0.86	0.6	0.76	0.63	0.34	0.32	0.23			n - amount of used tetrads
H2O	-	0.14	0.14	0.11	0.05	0.09	0.02			2 tetrad is note use in calculation, because:
ppm										Pm have only radioactive isotopes
Li	32.51	54.33	30.18	28.97	10.56	11.68	331.6			Eu fractionated with feldspars
Be	2.22	5.642	6.054	5.783	5.861	5.996	28.4
Sc	11.04	8.731	13.7	13.62	2.811	2.999	3.063
V	15.25	3.773	<d.l.	3.337	<d.l.	<d.l.	<d.l.
Cr	15.28	26.54	53.96	41.6	40.06	73.12	44.53
Co	-	1.45	1.973	1.689	1.035	1.7	0.489
Ni	3.31	13.91	23.5	24.21	19.07	33.34	14.99
Cu	11.08	82.13	14.1	13.1	12.07	21.15	9.089
Zn	104.2	94.63	90.75	127.4	38.88	49.25	23.18
Ga	28.77	25.73	27.34	23.85	33.5	32.66	57.34
Rb	133.7	235.6	296.4	194.9	318.4	300.1	765.9
Sr	113.1	32.2	74.15	79.2	19.98	24.08	6.649
Y	38.87	77.48	66	63.49	70.38	68.82	4.14
Zr	482.9	387.7	753.2	780.7	208.9	287	46.26
Nb	28.55	39.24	55.91	52.01	54.54	60.24	99.44
Mo	1.074	1.789	3.405	4.004	10.22	10.38	1.995
Cd	0.509	0.213	0.234	0.285	0.24	0.317	<d.l.
Sn	2.41167	4.47667	9.98933	6.41533	2.15367	2.53633	2.049
Sb	0.415	0.075	0.11	0.092	0.0895	0.095	0.1005
Te	<d.l.	0.104	<d.l.	<d.l.	<d.l.	<d.l.	<d.l.
Cs	2.769	4.011	2.74	2.398	2.058	2.105	7.586
Ba	1137	165.7	898.6	845.7	75.5	90.42	26.74
La	34.28	198.2	128.9	126	25.75	17.67	8.944
Ce	92.87	397.6	260.1	251.3	55.63	38.55	27.31
Pr	11.97	44.18	30.39	29.82	7.662	5.184	3.178
Nd	49.3367	155.9	112.4	113.967	32.5267	22.6567	8.751
Sm	10.2067	25.4467	19.84	19.3933	9.5	7.041	1.76433
Eu	1.622	0.641	1.669	1.8505	0.184	0.2	0.0595
Gd	8.78	18.99	16.2633	15.5333	9.83533	7.834	1.06533
Tb	1.31	2.795	2.414	2.314	1.914	1.634	0.226
Dy	7.833	15.3367	13.68	13.5733	13.1267	12.3567	1.60333
Ho	1.654	2.926	2.695	2.716	2.793	2.706	0.306
Er	4.65433	8.35067	7.70133	7.50967	8.86267	9.143	1.27033
Tm	0.698	1.173	1.102	1.175	1.486	1.614	0.3
Yb	4.584	7.382	7.11767	7.20933	10.2367	11.1167	3.036
Lu	0.706	1.044	1.045	1.059	1.522	1.667	0.421
Hf	12.99	10.95	17.36	17.19	11.61	14.98	9.726
Ta	2.528	2.027	3.012	2.928	4.835	5.55	61.81
W	-	0.95	10.73	2.659	1.327	1.716	5.996
Tl	0.957	1.4665	1.9075	1.1935	1.983	1.797	2.981
Pb	22.3967	22.5033	22.2367	19.33	43.55	50.2333	17.92
Bi	0.054	0.111	1.515	0.212	0.569	0.249	0.24
Th	12.06	28.75	19.04	20.35	51.26	66.47	12.1
U	1.085	4.056	3.529	3.23	18.08	20.76	1.278
Zr/Hf	37.1747	35.4064	43.3871	45.4159	17.9931	19.1589	4.75632
Nb/Ta	11.2935	19.3587	18.5624	17.763	11.2802	10.8541	1.6088
K/Rb	263.263	172.654	172.527	232.561	167.385	163.485	40.3205
Y/Ho	23.5006	26.4798	24.4898	23.3763	25.1987	25.4324	13.5294
TE1,3,4	1.01423	1.00791	0.993949	0.999334	1.03972	1.05091	1.30992
Fe2O3/FeO	-	1.7947	2.67911	3.41686	0.99123	1.13682	0.771187
t1=((Ce/Cet)×(Pr/Prt))1/2	1.13954	1.05976	1.03818	1.01537	1.00269	0.993063	1.4801
t3=((Tb/Tbt)×(Dy/Dyt))1/2	0.936323	0.978358	0.966871	0.9611	1.06527	1.08708	1.17437
t4=((Tm/Tmt)×(Yb/Ybt))1/2	0.977799	0.987543	0.978249	1.02268	1.05228	1.07512	1.29313
Ce/Cet=Cecn/(Lacn2/3×Ndcn1/3)	1.16193	1.05233	1.02275	0.998637	0.967756	0.972425	1.48937
Pr/Prt=Prcn/(Lacn1/3×Ndcn2/3)	1.11757	1.06726	1.05385	1.03238	1.03888	1.01414	1.47089
Tb/Tbt=Tbcn/(Gdcn2/3×Hocn1/3)	0.925274	0.975995	0.960694	0.947075	1.05253	1.0568	1.14301
Dy/Dyt=Dycn/(Gdcn1/3×Hocn2/3)	0.947504	0.980726	0.973087	0.975333	1.07817	1.11823	1.20658
Tm/Tmt=Tmcn/(Ercn2/3×Lucn1/3)	0.987381	0.9864	0.977766	1.05551	1.05919	1.09312	1.19826
Yb/Ybt=Ybcn/(Ercn1/3×Lucn2/3)	0.96831	0.988687	0.978732	0.990869	1.04541	1.05742	1.39551

## Sheet: ICP standarts
Measurement results of standard samples					Certified values of standard samples
					GSP-2					SGD-2а						SG-4
	GSP-2	SGD-2А	SG-4		Granodiorite, Silver Plume, Colorado.					Essexitic Gabbro, Dalbyrkey massif, East Trans-Baikal area.						Subalkaline Granite, Daura-Chentij massif, Mongolia.
Element	μg/g	μg/g	μg/g		Element	μg/g	±			Element	μg/g	±				Element	μg/g	±
Li	40.23	14.25	51.62		Li	36	1			Li	12	2				Li	40	4
Be	1.67	2.176	6.4		Be	1.5	0.2			Be	1.9	0.3				Be	5.7	0.8
Sc	8.346	24.58	3.597		Sc	6.3	0.7			Sc	26	3				Sc	1.9	0.4
V	52.82	259.9	<d.l.		V	52	4			V	250	24				V	5.8	0.7
Cr	23.75	46.04	32.26		Cr	20	6			Cr	58	5				Cr	29.4	3.4
Mn	326.7	1375	458.4		Mn	320	20
Co	6.677	38.26	0.585		Co	7.3	0.8			Co	40	4				Co	0.9	0.2
Ni	17.88	35.78	4.624		Ni	17	2			Ni	47	4				Ni	6.5	1
Cu	49.25	58.38	8.748		Cu	43	4			Cu	58	5				Cu	10.4	1.1
Zn	114.3	126.9	156.6		Zn	120	10			Zn	120	15				Zn	145	6
Ga	22.54	21.74	27.57		Ga	22	2			Ga	17	2				Ga	26	4
Rb	238.8	85.43	209.7		Rb	245	7			Rb	80	10				Rb	194	8
Sr	254.4	2565	29.98		Sr	240	10			Sr	2240	140				Sr	34	7
Y	24.53	27.69	75.15		Y	28	2			Y	30	3				Y	77.2	8
Zr	673.1	233.3	805.2		Zr	550	30			Zr	219	16				Zr	710	50
Nb	29.22	8.847	31.86		Nb	27	2			Nb	8.4	1.3				Nb	27	3
Mo	2.395	1.315	3.538		Mo	2.1	0.6			Mo	1.4	0.2				Mo	3.3	0.3
Sn	7.52933	2.97633	8.391							Sn	3.2	0.5				Sn	7.4	1.4
Cs	1.186	3.701	7.242		Cs	1.2	0.1			Cs	3.3	0.5				Cs	6.7	0.7
Ba	1157	891.3	125.2		Ba	1340	44			Ba	1520	150				Ba	123	16
La	184	75.62	84.02		La	180	12			La	82	10				La	91	7
Ce	489.5	182.7	185.7		Ce	410	30			Ce	163	20				Ce	177	27
Pr	56.77	22.84	22.5		Pr	51	5			Pr	20.7	3.7				Pr	22	3
Nd	224.133	94.3667	85.5		Nd	200	12			Nd	89	11				Nd	84	14
Sm	28.6567	16.7867	17.7333		Sm	27	1			Sm	17	2				Sm	19	3
Eu	2.496	4.065	0.609		Eu	2.3	0.1			Eu	3.9	0.5				Eu	0.64	0.06
Gd	13.6567	11.9167	15.4		Gd	12	2			Gd	11.5	2				Gd	15	2
Tb	1.578	1.438	2.542							Tb	1.5	0.2				Tb	2.5	0.3
Dy	6.10567	6.77867	15.1633		Dy	6.1				Dy	6.2	1				Dy	14.2	1.6
Ho	1.045	1.098	2.956		Ho	1	0.1			Ho	1.1	0.2				Ho	2.6	0.5
Er	2.56933	2.732	8.73433		Er	2.2				Er	2.8	0.55				Er	7.7	1.4
Tm	0.317	0.368	1.302		Tm	0.29	0.02									Tm	1.1	0.2
Yb	1.813	2.18333	8.208		Yb	1.6	0.2			Yb	2.5	0.3				Yb	7.4	1.4
Lu	0.264	0.31	1.205		Lu	0.23	0.03			Lu	0.3	0.05				Lu	1.3	0.3
Hf	15.93	6.494	17.81		Hf	14	1			Hf	5.3	0.9				Hf	18	2
Ta	1.115	0.749	1.846							Ta	0.5	0.1				Ta	1.7	0.3
W	0.577	1.445	3.301													W	3	0.5
Tl	1.372	0.234	1.597		Tl	1.1
Pb	41.39	14.2733	48.96		Pb	42	3			Pb	15	2				Pb	44	5
Th	122.7	8.287	20.62		Th	105	8			Th	8	1				Th	20	3
U	2.687	1.967	6.724		U	2.4	0.19			U	1.8	0.3				U	6.8	0.9
	GSP-2	Granodiorite, Silver Plume, Colorado,
