# Supplementary material for: Natural Experiment on the Extraction and Quenching of Rapakivi-like Magmas: Traces of Interaction with the Mafic Melts and Their Derivatives, Salmi Batholith (Karelia, Russia)
Source: MDPI journal article supplement (doi:10.3390/min13040527), 2023-04-08
Supplement: s1 [file TableS2_Zrn geochemistry.xls]

## Sheet: Zrn-LA-ICP-MS
Elements, ppm	Zrn1					Zrn5					Z10				Z16		Zrn17					Zrn21		Zrn25		Zrn26			Zrn29			Zrn33
	1	2	3	4	5	1	2	3	4	5	1	2	3	4	1	2	1	2	3	4	5	1	2	1	2	1	3	5	1	2	3	1	2
La	0.39	0.07	0.24	7.41	56.91	4.19388	2.14184	6.54575	0.49074	0.138402	13.2637	0.978774	0.923795	18.8115	0.286455	0.242677	0.282998	0.146034	0.544923	1.81273	0.16297	0.228117	0.202684	1.07679	0.410417	0.141566	0.294338	0.0849942	4.80288	6.81097	6.55029	3.81182	0.246151
Ce	9.23	9.84	10.73	30.79	156.7	13.0149	10.1236	17.7978	5.37284	5.50842	24.0311	8.56606	7.72132	42.9002	2.87629	4.29659	4.69627	3.16186	6.60556	16.4137	5.78142	6.29063	4.55325	5.72031	5.6192	9.5778	9.01958	4.33684	12.8109	21.0553	17.1808	32.2938	14.6735
Pr	0.34	0.41	0.31	3.72	17.9	1.77215	1.10307	2.09141	0.260584	0.128588	2.81207	0.649899	0.413015	6.27354	0.411342	0.448939	0.695055	0.35819	0.255586	0.526135	0.491801	0.850165	0.259589	0.8458	0.857514	0.372178	0.857297	0.139709	1.45893	2.51426	1.53084	1.72765	0.501357
Nd	4.36	6.62	3.97	20.08	96.46	16.3965	11.609	11.2739	1.88685	1.78042	13.9482	7.0408	3.02853	31.5905	6.56793	6.35268	10.2333	5.53959	2.31568	3.39507	8.37359	12.4466	3.44046	10.4339	11.064	7.04831	12.4642	2.36926	13.8751	20.2346	10.924	12.285	8.00306
Sm	8.25	11.36	7.01	8.52	23.29	14.1015	12.8627	8.68098	2.74206	3.15446	7.63802	8.12366	4.00798	7.51431	9.30598	9.31384	12.6064	7.21402	3.20946	4.24235	11.3143	16.3665	5.47105	11.5997	13.3063	11.0649	15.3305	3.96262	15.9836	15.9172	10.6675	11.9625	14.3218
Eu	0.52	0.59	0.35	0.38	0.42	1.87813	1.29972	0.860953	0.170794	0.281178	1.17975	0.586651	0.33414	0.295167	1.47696	1.19042	1.53509	1.00389	0.219814	0.133347	0.935182	1.58268	0.497945	1.52823	1.47635	0.387788	0.99573	0.361693	2.2408	1.20013	0.8925	0.205872	0.352182
Gd	38.62	47.21	34.82	23.48	43.71	50.9021	48.8912	32.2068	11.8271	16.4232	31.4017	32.2506	13.6786	17.9919	35.6127	39.6516	49.4026	30.3164	15.1532	21.4431	47.7109	66.7071	22.0313	44.3375	50.9482	48.1424	62.6869	18.779	60.5469	56.8145	40.3785	51.7285	67.644
Tb	8.04	12.93	13.54	4.87	10.41	15.78	13.3	9.92	3.7	15.45	17.71	7.32	5.49	4.38	9.69	9.58	12.87	9.25	4.05	7.45	13.38	19.52	5.8	13.37	12.17	8.24	5.51	6.01	15.96	14.31	11.6	15.278	17.9953
Dy	128.65	150.07	115.05	59.74	65.6	145.966	129.069	87.6918	41.6817	58.4082	82.9433	98.3174	49.2373	52.3471	105.309	107.537	131.28	85.0308	51.6649	77.6635	138.294	194.695	75.1267	125.832	143.405	154.984	179.189	60.5661	160.583	151.997	116.153	173.731	214.131
Ho	34.82	49.42	49.82	21.79	23.86	56.2	46.43	34.51	15.85	25.33	55.19	25.36	18.01	17.36	34.99	35.85	43.8	35.46	16.89	30.51	45.59	70.48	23.2	45.55	44.18	32.07	22.98	24.73	52.53	47.54	36.62	67.048	72.8939
Er	235.93	260.16	212.79	108.95	115.2	236.775	218.225	148.416	80.8502	113.06	135.233	171.163	97.1733	100.801	180.54	188.135	226.711	147.819	105.587	153.37	230.614	324.508	137.695	203.098	238.025	262.707	297.32	114.594	263.78	246.564	192.598	332.72	387.866
Yb	393.43	407.2	345.94	194.07	205.83	380.535	343.677	239.219	147.872	192.915	238.252	283.55	174.485	168.875	288.504	303.45	352.609	243.989	184.002	264.052	367.473	499.129	221.64	322.872	370.339	422.171	476.436	190.847	417.869	384.286	312.349	515.11	568.316
Lu	58.56	64.67	55.46	31.31	33.46	60.7249	55.6048	38.8369	24.9973	31.7259	38.0899	45.7351	28.3976	27.9335	49.1478	50.4366	57.8058	40.8167	31.4943	42.2726	59.7761	80.3864	37.4929	53.7846	61.8123	67.5249	72.2753	32.1293	67.6616	61.3404	48.7597	84.5226	91.2696
Li	0.162893	0.135795	0.167625	0.29123	0.358962	0.124904	0.319072	0.360578	0.0685384	0.0818513	2.0386	0.101729	0.379207	1.26618	0.0524945	0.0654491	0.0563037	0.0391691	0.0698817	0.234563	0.0650373	0.0895361	0.0821245	0.656863	0.057095	0.145474	0.112399	0.0698256	0.130808	0.110303	0.135883	0.23309	0.293952
P	166.291	219.936	220.611	227.944	862.152	536.138	155.575	125.149	91.2532	96.1213	153.045	137.273	114.41	475.542	229.402	116.018	141.556	116.947	146.461	100.244	148.73	142.082	178.554	105.788	117.332	120.634	150.414	131.791	146.609	299.279	138.077	174.17	184.484
Ca	147.857	40.5481	162.391	1056.87	1810.3	1475.56	2084.02	1848.59	78.4395	96.9169	1549.68	289.249	169.539	1074.69	13.9189	15.8048	31.7683	35.239	48.8665	337.535	42.1045	12.9169	39.4085	71.9057	147.576	64.2289	85.7587	84.0176	378.962	638.443	558.187	84.1908	87.8089
Ti	27.5235	21.1907	21.0073	34.5071	25.2583	58.9571	50.7642	42.8731	28.22	26.7281	52.2359	28.3307	45.287	20.4167	53.9046	32.6048	49.966	41.4865	23.4359	17.932	27.9971	35.452	32.5788	38.3877	37.4448	20.1642	29.0156	33.7014	43.3692	42.7237	33.4275	13.0682	15.6957
Sr	1.79713	0.765121	1.46586	5.71679	3.95093	10.1096	10.2399	9.78332	1.02421	0.944575	7.54201	1.60304	37.097	4.19667	0.42016	0.318872	0.749129	0.495946	0.485861	2.87174	1.29603	0.4873	0.506625	4.08931	1.03935	3.12329	1.97413	2.51541	2.90484	3.25863	3.74553	0.490201	1.20293
Y	1344.84	1448.1	1189.66	597.22	639.665	1393.3	1181.61	808.703	415.965	601.067	847.825	979.126	503.299	521.171	949.939	1041.36	1248.47	829.478	546.168	823.587	1313.85	1817.24	733.804	1168.51	1340.76	1553.8	1697.2	621.365	1514.92	1464.49	1088.57	1816.65	2114.9
Nb	149.163	93.2771	58.4095	54.0431	44.4254	33.313	46.0559	29.7787	52.1552	29.565	14.623	15.9094	16.533	13.8414	13.3486	25.4452	10.4249	9.31186	14.5907	16.3678	13.04	15.6058	8.20484	10.868	11.9631	21.9586	11.8302	8.59111	1.64735	6.46331	4.74563	11.9824	17.598
Ba	5.51529	3.4155	6.32415	27.6576	13.1058	6.58283	11.6191	43.9608	5.76274	2.99261	47.5034	3.29994	3.2383	33.6507	2.43538	2.54499	2.56008	2.48902	2.62624	15.8398	3.03961	1.80825	2.56782	4.99552	3.69126	1.35722	2.01314	1.98083	9.16938	7.02298	17.5045	6.32084	2.39774
Hf	10475	10860	10569	11104	11983	8769.26	10421.9	10211.1	10463.3	10161.2	8472.74	9500.81	10434.8	9136.94	8318.78	9470.94	8961.01	9307.67	10315.9	10851.1	10031.2	9279.71	9674.96	8943.15	8999.07	10321	9073.95	9462.95	7999.64	8726.84	8754.24	14387.9	11595.6
Th	43.1314	51.5753	48.4811	28.408	35.4731	23.3015	30.2278	22.4742	14.3648	22.9125	15.6373	27.9384	19.2836	24.8164	19.0623	23.6418	24.1558	15.195	21.4823	56.5792	31.8299	46.4195	25.7964	19.9985	25.0638	59.1085	50.0807	19.8874	30.16	35.2297	30.0198	116.179	127.878
U	76.1803	85.7	86.6176	63.543	86.1	39.2966	47.4562	38.082	36.6462	49.8401	30.9798	51.0066	42.2016	52.2766	36.7697	44.4611	37.3381	25.9245	46.9498	118.892	53.1187	71.3551	51.8671	34.2908	41.3584	98.2473	82.3432	41.8427	47.2973	53.9507	48.4992	217.984	200.639
Th/U	0.57	0.601812	0.559715	0.447067	0.411999	0.592967	0.636962	0.590155	0.391987	0.45972	0.504759	0.547741	0.45694	0.474714	0.518424	0.531742	0.646948	0.586126	0.457559	0.475887	0.599222	0.650542	0.497356	0.583203	0.606013	0.60163	0.608195	0.47529	0.637668	0.652999	0.618975	0.532971	0.637357
Eu/Eu*	0.59	0.594571	0.419152	0.512137	0.386263	1.78995	1.27264	1.03535	0.345421	0.492726	1.45582	0.711229	0.609561	0.443596	1.69598	1.31282	1.50121	1.26417	0.39685	0.203872	0.939131	1.33856	0.731708	1.5725	1.41745	0.389129	0.869074	0.586821	1.97076	1.08098	0.961094	0.19915	0.30095
ΣREE	878.28	958.2	786.67	488.45	815.48	926.26	834.607	593.621	318.152	423.523	588.793	656.962	379.4	475.334	680.038	711.056	847.858	565.396	401.052	585.324	870.928	1203.19	508.411	781.129	897.263	984.122	1126.87	428.171	1021.61	968.735	757.984	1220.1	1367.33
ΣLREE	23.09	28.89	22.61	70.9	351.68	51.3571	39.1399	47.2508	10.9239	10.9915	62.8729	25.9458	16.4288	107.385	20.925	21.8451	30.0491	17.4236	13.151	26.5233	27.0593	37.7647	14.425	31.2047	32.7338	28.5925	38.9616	11.2551	51.1723	67.7325	47.7459	62.2866	38.098
ΣHREE	855.19	929.31	764.06	417.55	463.8	874.903	795.467	546.37	307.228	412.532	525.92	631.016	362.972	367.949	659.113	689.211	817.809	547.972	387.901	558.801	843.869	1165.43	493.986	749.924	864.529	955.53	1087.91	416.916	970.44	901.002	710.238	1157.81	1329.23
T(Ti)oC	838	811.427	810.553	862.784	829.377	925.115	907.026	887.246	841.021	835.287	910.439	841.437	893.586	807.698	914.217	856.563	905.142	883.474	821.65	794.891	840.18	865.772	856.476	874.663	871.869	806.456	843.98	860.184	888.572	886.844	859.288	764.902	782.058
T(Ti)oC estimated by [24]
rejected data
Elements, ppm	Zrn5	Zrn16	Zrn26
La	35.1803	6.78733	2.45135
Ce	75.4828	20.0866	9.65665
Pr	9.77933	2.25145	0.806141
Nd	42.4409	13.003	4.87568
Sm	15.3295	5.82021	2.85805
Eu	1.34591	0.599163	0.229372
Gd	58.1235	19.3354	10.132
Tb	9.81	4.51	11.85
Dy	109.2	50.4358	34.8489
Ho	33.48	18.47	46.6
Er	174.542	93.6004	67.9826
Yb	276.663	165.063	121.426
Lu	43.154	27.3537	20.2999
Li	6.22649	4.89254	3.45153
P	189.606	412.617	145.037
Ca	8721.69	1244.64	1566.85
Ti	441.049	321.371	447.716
Sr	30.1435	4.36828	10.5622
Y	992.134	521.748	375.639
Nb	30.4905	16.5242	17.6856
Ba	194.854	34.08	294.466
Hf	7877.59	9074.17	7600.53
Th	20.8533	17.1256	14.8411
U	38.7472	39.3909	34.7531
Th/U	0.54	0.434761	0.427044
Eu/Eu*	1.21	0.92	0.49
ΣREE	884.531	427.316	334.017
ΣLREE	179.559	48.5477	20.8773
ΣHREE	704.973	378.768	313.14
T(Ti)oC	1236	1177	1239
