# Supplementary material for: Natural Experiment on the Extraction and Quenching of Rapakivi-like Magmas: Traces of Interaction with the Mafic Melts and Their Derivatives, Salmi Batholith (Karelia, Russia)
Source: MDPI journal article supplement (doi:10.3390/min13040527), 2023-04-08
Supplement: s1 [file TableS3_EPMA data.xls]

## Sheet: Zrn17
wt%
Spectrum	S	Fe	Total
1	38.52	60.34	98.86
2	36.78	62.84	99.62
3	36.58	62.31	98.89
4	38.48	60.55	99.03
At%
Spectrum	S	Fe	Total
1	52.65	47.35	100
2	50.48	49.52	100
3	50.55	49.45	100
4	52.54	47.46	100
wt%
Spectrum	O	F	Na	Mg	Al	Si	P	Cl	K	Ca	Ti	Mn	Fe	Zn	total
5	24.24				1.16						8.28		61.22	0.54	95.44
6	32.07										31.83	0.49	37.23		101.62
7	35.79			1.11	8.15	15.16		0.17	7.04		2.34		26.26		96.02
8	34.41			1.22	7.81	14.78		0.16	6.68		2.31		26.15		93.51
9	32.18					14.45						0.97	53.89		101.49
10	31.58										31.23	0.56	36.85		100.22
11	31.92										31.62	0.54	37.15		101.22
12	37.1	9.31	0.19			0.56	16.4			38.14					101.7
13	32.32					14.71						0.94	53.39		101.35
14	24.38				1.22						8.95		60.03	0.51	95.08
15	23.46				0.99	0.31					7.31		60.14	0.49	92.7
16	46.89		5.96		11.54	28.63				2.7			3.01		98.73
At%
Spectrum	O	F	Na	Mg	Al	Si	P	Cl	K	Ca	Ti	Mn	Fe	Zn	total
5	53.43				1.52						6.09		38.66	0.29	100
6	59.93										19.87	0.27	19.93		100
7	58.43			1.19	7.89	14.1		0.12	4.7		1.28		12.28		100
8	57.99			1.36	7.81	14.19		0.12	4.61		1.3		12.63		100
9	57.33					14.66						0.5	27.51		100
10	59.89										19.78	0.31	20.02		100
11	59.91										19.82	0.29	19.98		100
12	53.7	11.35	0.19			0.46	12.26			22.03					100
13	57.44					14.89						0.49	27.18		100
14	53.69				1.59						6.58		37.87	0.27	100
15	53.31				1.33	0.41					5.54		39.14	0.27	100
16	61.6		5.44		8.99	21.42				1.42			1.13		100

## Sheet: Zrn33
wt%
Spectrum	S	Fe	Co	Ni	Cu	Zn	As	Cd	Total
1	33.26	7.55				57.05		0.44	98.3
2	34.7	29.22			33.26	0.73			97.91
3	32.15	6.62				56.16		0.37	95.3
4	20.77	23.84	6.21	1.24		1.36	50.29	0.13	103.82
5	31.47	7.04			0.7	54.35		0.36	93.92
6	33.71	7.46			0.23	57.71		0.41	99.51
7	32.77	6.96				58.23		0.45	98.41
8	32.88	7.01				57.77		0.41	98.07
9	33.01	7.18				57.24		0.4	97.83
10	34.21	7.5			1.83	55.54		0.47	99.55
11	31.53	6.27			0.67	54.85			93.32
12	33.23	7.77				57.39		0.49	98.88
at%
Spectrum	S	Fe	Co	Ni	Cu	Zn	As	Cd	Total
1	50.62	6.6				42.59		0.19	100
2	50.57	24.45			24.46	0.52			100
3	50.55	5.98				43.31		0.17	100
4	34.2	22.53	5.56	1.11		1.09	35.44	0.06	100
5	50.25	6.46			0.56	42.57		0.16	100
6	50.67	6.44			0.17	42.55		0.17	100
7	50.06	6.11				43.64		0.19	100
8	50.31	6.16				43.35		0.18	100
9	50.53	6.31				42.98		0.17	100
10	51.2	6.44			1.38	40.78		0.2	100
11	50.55	5.77			0.54	43.13			100
12	50.36	6.76				42.67		0.21	100
