# Supplementary material for: Natural Experiment on the Extraction and Quenching of Rapakivi-like Magmas: Traces of Interaction with the Mafic Melts and Their Derivatives, Salmi Batholith (Karelia, Russia)
Source: MDPI journal article supplement (doi:10.3390/min13040527), 2023-04-08
Supplement: s1 [file TableS4_LA-ICP-MS data.xls]

## Sheet: LA-ICP-MS
№	Element concentration, ppm									Detection limit
	Co	Ni	Cu	Zn	Mo	Ag	Cd	Au	Pb	Co	Ni	Cu	Zn	Mo	Ag	Cd	Au	Pb
1	390	3.9	1062	2340	936	22.2	<d.l.	<d.l.	1.41	<1,54	13.44	8.61	<12,46	<3,86	2.11	<11,05	0.03	0.52
2	360	42	1320	2580	741	5.4	<d.l.	<d.l.	2.07	3.66	15.1	15.6	22.46	4.95	1.95	<11,05	0.03	0.58
3	78	270	12900	57	156	20.4	<d.l.	<d.l.	<d.l.	<1,54	<5,21	-	30.48	<3,86	<1,15	<11,05	0.03	<0,3
4	69	375	12900	207	120	21.3	39	<d.l.	<d.l.	2.81	18.66	-	<12,46	<3,86	<1,15	<11,05	0.03	<0,3
9	4200	240	14700	<d.l.	1830	13.2	<d.l.	<d.l.	<d.l.	<1,54	24.02	-	<12,46	<3,86	<1,15	<11,05	0.03	<0,3
6	128.4	315	15700	168	233.7	<d.l.	<d.l.	<d.l.	<d.l.	1.54	5.21	-	<12,46	<3,86	<1,15	<11,05	0.03	<0,3
8	144	186	15700	228	168	5.7	<d.l.	2.01	<d.l.	<1,54	11.73	-	<12,46	<3,86	1.84	<11,05	0.03	<0,3
5	177	249	16200	405	174	12.6	18	<d.l.	<d.l.	<1,54	54	-	29.39	<3,86	<1,15	<11,05	0.03	<0,3
11	213	222	19000	207	399	4.2	<d.l.	<d.l.	<d.l.	3.13	23.75	-	<12,46	<3,86	<1,15	<11,05	0.03	<0,3
12	126	276	26600	1170	153	17.4	<d.l.	<d.l.	<d.l.	<1,54	10.06	-	18.22	5.65	2.22	<11,05	0.03	<0,3
16	189	480	30700	2130	135	17.1	<d.l.	<d.l.	<d.l.	3.29	22.23	-	34.48	<3,86	4.21	<11,05	0.03	<0,3
10	147	417	32000	270	126	18.6	<d.l.	<d.l.	<d.l.	<1,54	17.29	-	<12,46	<3,86	<1,15	<11,05	0.03	<0,3
15	47.7	102	32000	981	240	20.1	<d.l.	<d.l.	6.42	<1,54	18.04	-	<12,46	<3,86	2.03	<11,05	0.03	0.57
7	180	309	33700	120	222	19.8	<d.l.	<d.l.	3.81	<1,54	11.77	-	12.46	3.86	<1,15	<11,05	0.03	0.3
14	55.8	123	36000	909	210	<d.l.	<d.l.	<d.l.	3.78	<1,54	16.03	-	<12,46	<3,86	<1,15	<11,05	0.03	0.38
13	165	222	36900	3960	144	174	<d.l.	<d.l.	3.3	<1,54	23.75	-	30.59	<3,86	<1,15	<11,05	0.03	0.62
17	534	597	51000	372	882	45.6	<d.l.	37.2	1.98	<1,54	16.82	-	<12,46	<3,86	2.64	<11,05	0.03	0.53
Element concentration, ppm													Note:
№	Co	Ni	Cu	Mo	Ag	Cd	Pb	As	Se	In	Hg		All values is presented in ppm
18	174	36	4770	33	16.2	1329	8.4	630	348	108	117			Green fill - values obtained using EPMA
Detection limit
18	<1,54	8.16	7.99	3.63	<0,02	<11,05	0.31	15.08	<14,54	<0,12	5.82
